# Supplementary material for: Validation of an NGS Panel Designed for Detection of Actionable Mutations in Tumors Common in Latin America
Source: J Pers Med. 2021 Sep 8;11(9):899. doi: 10.3390/jpm11090899 (PMC8472524; doi:10.3390/jpm11090899)
Supplement: Supplementary file 1 [file jpm-11-00899-s001.zip › jpm-1311481-supplementary.pdf]

## Supplementary Materials.

**Table S1.** Sequencing metrics (median) for all samples that passed QC.

|                                                    | Sample Type     |                 |                        |
|----------------------------------------------------|-----------------|-----------------|------------------------|
|                                                    | FFPE<br>(n=116) | Blood<br>(n=79) | Fresh Frozen<br>(n=15) |
| % Duplicated reads                                 | 34.8            | 9.5             | 9.15                   |
| % of reads in target region                        | 59.1            | 69.1            | 65.8                   |
| Average coverage in target region                  | 1,145.5         | 798.5           | 789.1                  |
| % Uniformity                                       | 94.1            | 96.0            | 91.1                   |
| % of target regions with coverage $\geq 300\times$ | 99.0            | 97.4            | 90.0                   |

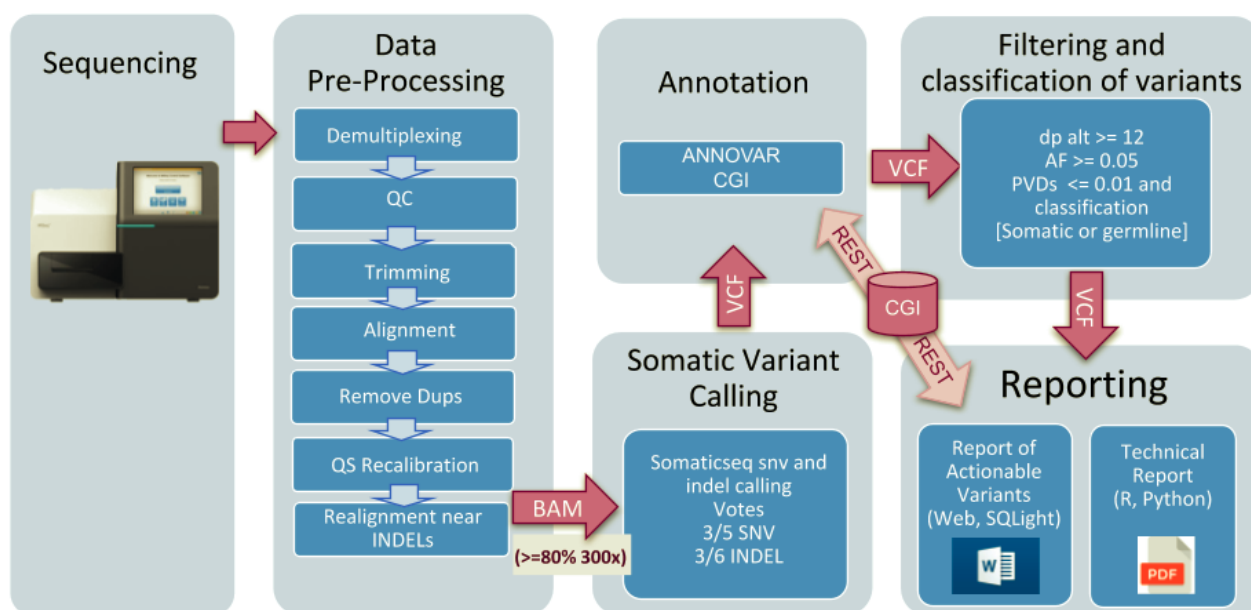

**Figure S1.** General workflow of the bioinformatic pipeline for identifying somatic variants. Gray boxes correspond to automated processes. Blue squares show the main sub-processes. Key input and output files are shown in arrows.

A

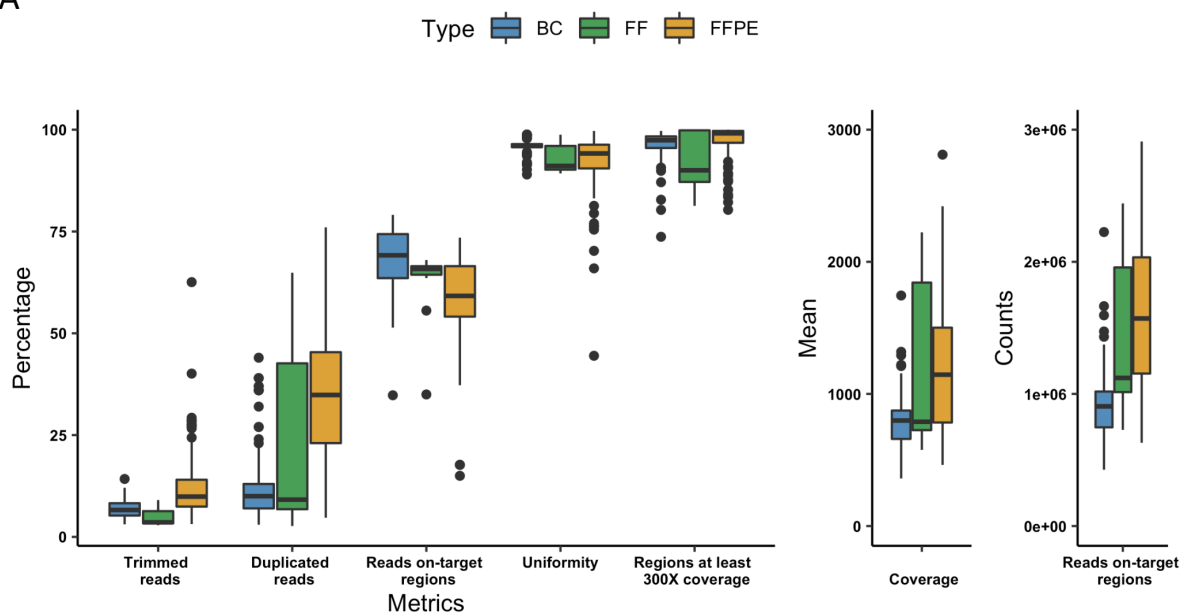

B

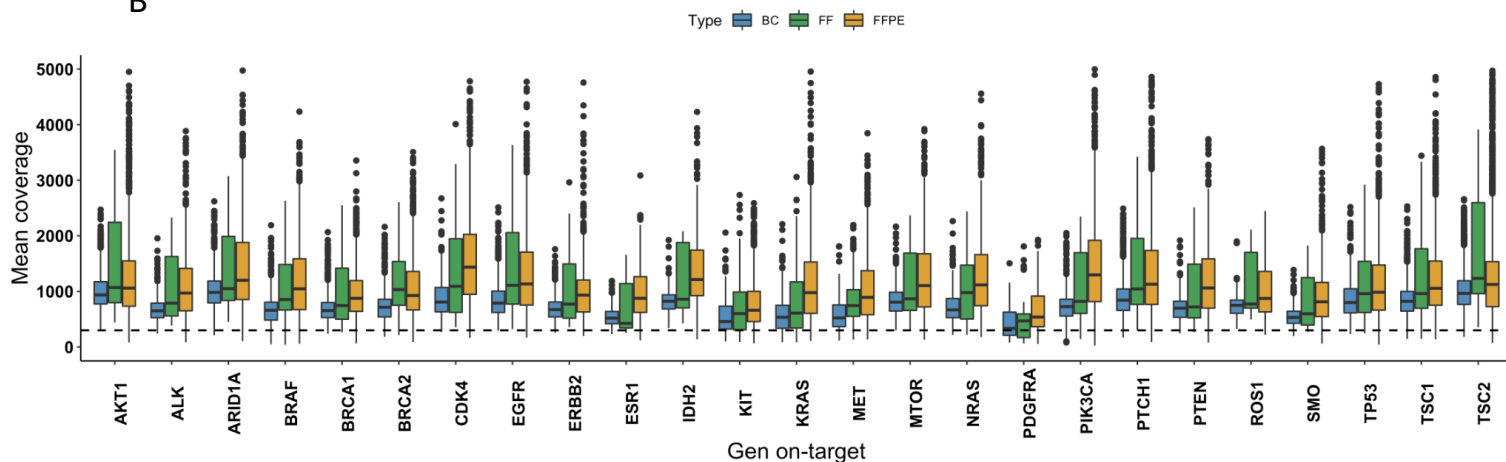

**Figure S2. Sequencing metrics and mean coverage of targeted genes according to sample type** **A)** Box plot of sequencing metrics by type of sample (79 BC, 15 FF, and 116 FFPE). BC: Buffy coat; FF: Fresh Frozen; FFPE: Formalix-fix Paraffin-Embedded. Each box shows the data distribution divided into quartiles. The centerline shows the median, and outlier points are in black. **B)** Box plot of mean coverage of on-target regions per-gene for each type of sample: BC (blue), FF (green), and FFPE (orange). The centerline shows the median, and outlier points are shown in black. The vertical dotted line shows 300X coverage.

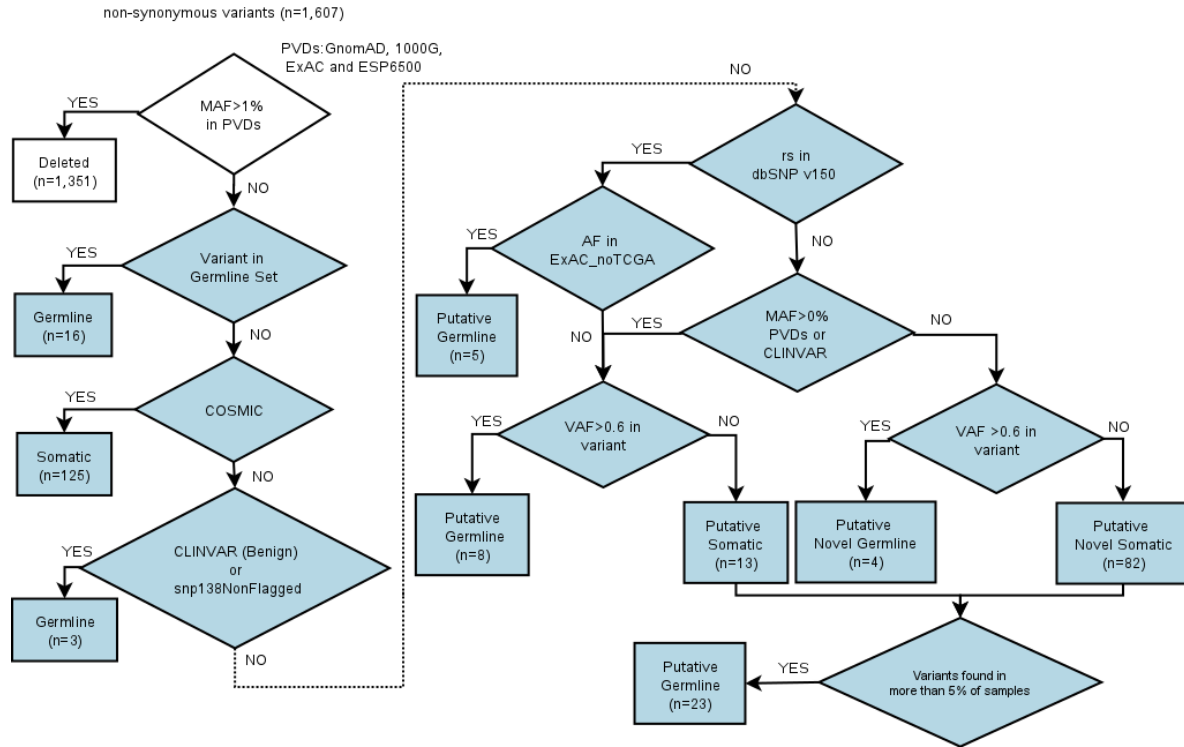

**Figure S3. Algorithm for variant's classification.** Each conditional sequentially classifies variants as somatic or germinal (known, putative, or putative novel). 1) Variants with MAF over 1% in PVDs are deleted (n=1,351). 2) variants found in blood samples (BC) are labeled as germline in tumor samples (n=16). 3) Variants with a COSMIC annotation are labeled as somatic (n=125). 4) Benign or likely benign variants according to Clinvar or rs in snp138NonFlagged, are labeled as putative germline (n=3). 5) Variants with rs in dbSNP and reported in ExAC no-TCGA are labeled as putative germline (n=5). 6-7) Variants without classification and rs in dbSNP, MAF between 0-1% in PVDs or Clinvar information, are labeled as putative germline (n=8) or putative somatic (n=13) when VAF in the samples is >60% or <60%, respectively. 8) Variants without classification are labeled as putative novel germline (n=4) or putative novel somatic (n=82) when VAF in the samples is >60% or <60%, respectively. 9) Finally, variants classified as putative somatic or putative novel somatic found in more than 3 (5%) samples are re-classified as putative germline (n=23). MAF: minor allele frequency, PVDs: Population Variants Databases, COSMIC: Catalogue of Somatic Mutations in Cancer, Snp138NonFlagged: dbSNP without flagged SNPs (SNPs with MAF < 1% or unknown, mapping only once to reference assembly or with a clinical association), rs: Reference SNP, VAF: Variant Allele Frequency.
